# Supplementary material
Source: HighWire-hosted journal article supplement (https://qualitysafety.bmj.com/highwire/filestream/161160/field_highwire_adjunct_files/3/bmjqs-2021-013760supp004_data_supplement.pdf)
Supplement: bmjqs-2021-013760supp004_data_supplement.pdf [file bmjqs-2021-013760supp004_data_supplement.pdf]

## Additional File 4: Risk of Bias and GRADE assessments

|                   |                         | Risk of bias domains |    |    |    |    |    |    | Overall |
|-------------------|-------------------------|----------------------|----|----|----|----|----|----|---------|
|                   |                         | D1                   | D2 | D3 | D4 | D5 | D6 | D7 |         |
| Study             | Anstey 2019 [54]        | ⊗                    | +  | +  | +  | +  | -  | +  | ⊗       |
|                   | Bosma 2018 [13]         | -                    | +  | +  | +  | +  | -  | +  | -       |
|                   | Buckley 2015 [55]       | ⊗                    | +  | +  | +  | +  | -  | +  | ⊗       |
|                   | Coon 2015 [56]          | ⊗                    | +  | +  | +  | +  | -  | +  | ⊗       |
|                   | D'Angelo 2019 [57]      | -                    | +  | +  | +  | +  | -  | -  | ⊗       |
|                   | Hammond 2017 [58]       | ⊗                    | +  | +  | +  | +  | -  | +  | ⊗       |
|                   | Hatch 2010 [59]         | ⊗                    | +  | +  | +  | -  | -  | +  | ⊗       |
|                   | Kram 2019 [60]          | ⊗                    | +  | +  | +  | +  | -  | +  | ⊗       |
|                   | Medlock 2011 [61]       | -                    | +  | +  | +  | +  | -  | +  | -       |
|                   | Meena 2015 [47]         | ⊗                    | +  | +  | +  | +  | -  | +  | ⊗       |
|                   | Parsons Leigh 2020 [48] | ⊗                    | -  | +  | +  | +  | -  | +  | ⊗       |
|                   | Pavlov 2014 [49]        | -                    | +  | +  | +  | +  | -  | -  | ⊗       |
|                   | Pronovost 2003 [50]     | ⊗                    | +  | ⊗  | +  | ⊗  | -  | +  | !       |
|                   | Stuart 2020 [53]        | ⊗                    | +  | +  | +  | -  | -  | +  | ⊗       |
|                   | Tasaka 2014 [51]        | ⊗                    | +  | +  | +  | +  | -  | +  | ⊗       |
| Zeigler 2008 [52] | ⊗                       | +                    | +  | +  | +  | -  | +  | ⊗  |         |

Domains:  
D1: Bias due to confounding.  
D2: Bias due to selection of participants.  
D3: Bias in classification of interventions.  
D4: Bias due to deviations from intended interventions.  
D5: Bias due to missing data.  
D6: Bias in measurement of outcomes.  
D7: Bias in selection of the reported result.

Judgement  
! Critical  
⊗ Serious  
- Moderate  
+ Low

**Figure S1. Robvis representation of ROBINS-I risk of bias assessments of non-randomised controlled trial studies**

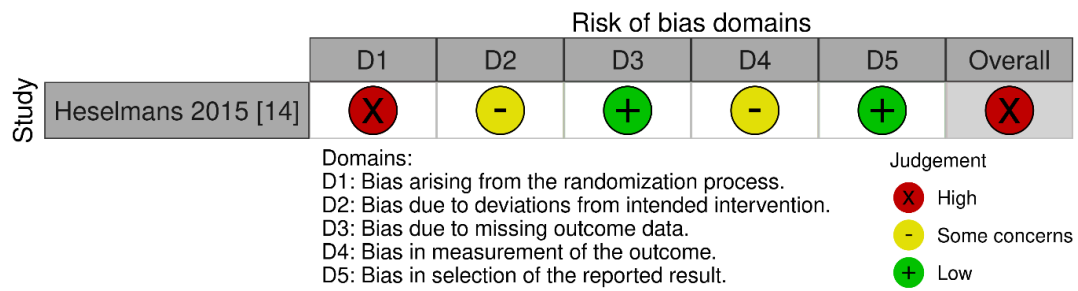

**Figure S2. Robvis representation of ROB2.0 risk of bias assessments of the randomised controlled trial study**

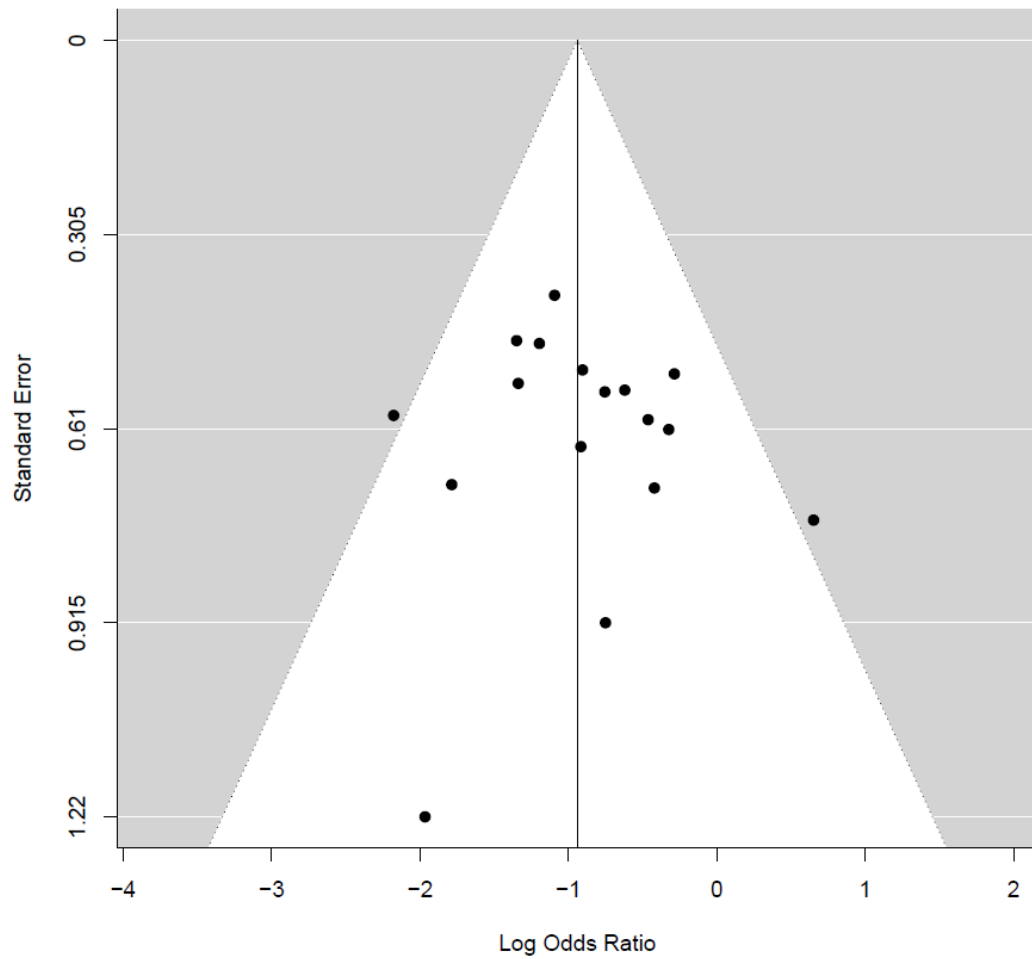

**Figure S3.** Funnel plot of the treatment effect estimates from individual studies included in the meta-analysis

| No of studies                                                                                                        | Study design          | Certainty assessment      |                      |                      |             |                                 | Effect (OR) (95% CI)   | Certainty             |
|----------------------------------------------------------------------------------------------------------------------|-----------------------|---------------------------|----------------------|----------------------|-------------|---------------------------------|------------------------|-----------------------|
|                                                                                                                      |                       | Risk of bias              | Inconsistency        | Indirectness         | Imprecision | Other considerations            |                        |                       |
| Main meta-analysis. All de-escalation studies - ICU discharge inappropriate medication therapy                       |                       |                           |                      |                      |             |                                 |                        |                       |
| 9                                                                                                                    | observational studies | very serious <sup>a</sup> | not serious          | serious <sup>b</sup> | not serious | strong association <sup>c</sup> | OR 0.45 (0.31 to 0.63) | ⊕⊕○○<br>LOW           |
| Main meta-analysis. All de-escalation studies - Hospital discharge inappropriate medication therapy                  |                       |                           |                      |                      |             |                                 |                        |                       |
| 9                                                                                                                    | observational studies | very serious <sup>a</sup> | serious <sup>d</sup> | serious <sup>b</sup> | not serious | strong association <sup>c</sup> | OR 0.39 (0.2 to 0.76)  | ⊕○○○<br>○<br>VERY LOW |
| Sub-group meta-analysis. Multicomponent de-escalation studies - ICU discharge inappropriate medication therapy       |                       |                           |                      |                      |             |                                 |                        |                       |
| 3                                                                                                                    | observational studies | very serious <sup>a</sup> | not serious          | not serious          | not serious | strong association <sup>c</sup> | OR 0.37 (0.23 to 0.59) | ⊕⊕⊕○<br>MODERATE      |
| Subgroup meta-analysis. Multicomponent de-escalation studies - Hospital discharge inappropriate medication therapy   |                       |                           |                      |                      |             |                                 |                        |                       |
| 6                                                                                                                    | observational studies | very serious <sup>a</sup> | not serious          | not serious          | not serious | strong association <sup>c</sup> | OR 0.26 (0.13 to 0.55) | ⊕⊕⊕○<br>MODERATE      |
| Subgroup meta-analysis. Single component de-escalation studies - ICU discharge inappropriate medication therapy      |                       |                           |                      |                      |             |                                 |                        |                       |
| 5                                                                                                                    | observational studies | very serious <sup>a</sup> | not serious          | serious <sup>b</sup> | not serious | strong association <sup>c</sup> | OR 0.42 (0.24 to 0.74) | ⊕⊕○○<br>LOW           |
| Subgroup meta-analysis. Single component de-escalation studies - Hospital discharge inappropriate medication therapy |                       |                           |                      |                      |             |                                 |                        |                       |
| 3                                                                                                                    | observational studies | very serious <sup>a</sup> | not serious          | serious <sup>b</sup> | not serious | None                            | OR 0.77 (0.16 to 3.74) | ⊕○○○<br>○<br>VERY LOW |

**Table S3: Meta-analysis GRADE assessments****Explanations**<sup>a</sup>High-risk of bias on ROBINS-I (downgraded 2 levels)<sup>b</sup>Significant variability in intervention components and timing of delivery (downgraded 1 level)<sup>c</sup>Large effect – OR <0.5 (upgraded 1 level)<sup>d</sup>Heterogeneity ( $I^2 \geq 75\%$ ) (downgraded 1 level)
